# Supplementary material for: Marine sulfate-reducing bacteria cause serious corrosion of iron under electroconductive biogenic mineral crust
Source: PubMed Central journal article supplement (PMC3429863; doi:10.1111/j.1462-2920.2012.02778.x), 2012-07
Supplement: emi0014-1772-SD12.pdf [file emi0014-1772-SD12.pdf]

# Marine sulfate-reducing bacteria cause serious corrosion of iron under electroconductive biogenic mineral crust

Dennis Enning, Hendrik Venzlaff, Julia Garrelfs, Hang T. Dinh, Volker Meyer, Karl Mayrhofer, Achim W. Hassel, Martin Stratmann and Friedrich Widdel

**Table S1.** Compilation of corrosion rates recorded for (anoxic) natural and engineered environments, and for laboratory cultures of sulfate-reducing bacteria.

| Location                                         | Type of environment                                          | Corrosion rate (mm yr <sup>-1</sup> ) <sup>a</sup> | Method <sup>b</sup>          | Reference                      |
|--------------------------------------------------|--------------------------------------------------------------|----------------------------------------------------|------------------------------|--------------------------------|
| Bohai Bay, China                                 | Marine sediment                                              | 0.03 – 0.09                                        | Weight loss                  | Li (2009)                      |
| Draugen Oil Field, Norwegian North Sea           | Produced water re-injection system; untreated produced water | 0.12                                               | Electrochemical <sup>c</sup> | Vik <i>et al.</i> (2007)       |
| Tonnenlegerbucht, German North Sea               | Marine anoxic sediment                                       | 0.12 – 0.28                                        | Weight loss                  | This study                     |
| South Korea                                      | Gas transmission pipelines; disbonded coating                | 0.33 – 0.47                                        | Pit measurement              | Li <i>et al.</i> (2000)        |
| Gullfaks Oil Field, Norwegian North Sea          | Water injection system; biocide treatment                    | 0.09 – 0.75                                        | Weight loss                  | Boedtke <i>et al.</i> (2008)   |
| Culture                                          | Type of energy source, medium <sup>d</sup>                   | Corrosion rate (mm yr <sup>-1</sup> ) <sup>e</sup> | Method                       | Reference                      |
| <i>Desulfovibrio sp.</i>                         | Lactate-based, freshwater                                    | 0.007                                              | Weight loss                  | Hardy and Brown (1984)         |
| <i>Desulfovibrio vulgaris</i> , Woolwich         | Lactate-based, freshwater                                    | 0.024                                              | Weight loss                  | Gaylarde (1992)                |
| <i>Desulfovibrio desulfuricans</i> , New Jersey  | Lactate-based, marine                                        | 0.094                                              | Weight loss                  | Beech <i>et al.</i> (1994)     |
| <i>Desulfovibrio desulfuricans</i>               | Lactate-based, brackish                                      | 0.285                                              | Weight loss                  | Bell and Lim (1981)            |
| SRB bioreactor                                   | Lactate-based, brackish                                      | 0.408                                              | Weight loss                  | Hubert <i>et al.</i> (2005)    |
| <i>Desulfovibrio vulgaris</i> , Hildenborough    | H <sub>2</sub> , freshwater <sup>f</sup>                     | 0.500                                              | Electrochemical <sup>g</sup> | Pankhania <i>et al.</i> (1986) |
| Sterile artificial seawater                      | Fe <sup>0</sup> lithotrophy, marine                          | 0.010                                              | Weight loss                  | This study                     |
| <i>Desulfopila inferna</i>                       | Fe <sup>0</sup> lithotrophy, marine                          | 0.012                                              | Weight loss                  | This study                     |
| ' <i>Desulfopila corrodens</i> ', strain IS4     | Fe <sup>0</sup> lithotrophy, marine                          | 0.311                                              | Weight loss                  | This study                     |
| ' <i>Desulfovibrio ferrophilus</i> ', strain IS5 | Fe <sup>0</sup> lithotrophy, marine                          | 0.710                                              | Weight loss                  | This study                     |

a. Corrosion rate in natural and engineered environments. The recorded range is given. Corrosion must not necessarily be influenced by SRB in these systems.

b. Method of corrosion rate determination. Weight loss is considered the most accurate technique.

c. A linear polarisation resistance (LPR) probe was used.

d. Energy source for SRB metabolism is indicated. All cultures contained iron or mild steel. 'Fe<sup>0</sup> lithotrophy' indicates that metallic iron was the only available source of reducing equivalents. Salt content of media (freshwater, brackish, marine) is also designated.

e. Corrosion rate in cultures of SRB. The maximal reported value is given. The large range of corrosion rates for SRB with external energy source is attributed to the sometimes protective properties of formed FeS films (see text).

f. H<sub>2</sub> from previous polarisation experiment was available in these cultures.

g. Calculated from slope of cathodic polarisation curve by overvoltage-intercept method.
